# Supplementary material for: learnMSA: learning and aligning large protein families
Source: PubMed Central journal article supplement (PMC9673500; doi:10.1093/gigascience/giac104), 2022-11-18
Supplement: giac104_response_to_reviewer_comments_revision_1.pdf [file giac104_response_to_reviewer_comments_revision_1.pdf]

## Author's Response To Reviewer Comments

Close

We added the citation to the GigaDB dataset.

Close
